# Supplementary material
Source: PubMed Central journal article supplement (PMC2936757)
Supplement: supp_D004606_jlr.D004606-1.pdf [file supp_D004606_jlr.D004606-1.pdf]

## **Supplementary data to:**

### **Skonberg et al, Pitfalls in the sample preparation and analysis of *N*-acylethanolamines**

Table text:

Table S1A. Calculated concentrations (pM) of PEA in examined chloroforms, hexane and ethyl acetate. Concentrations are calculated relative to injected standards of 1  $\mu$ M PEA in MeCN, taking into account the volume of solvent evaporated (15, 30 or 60 mL) and the reconstitution volume (100  $\mu$ L MeOH). (< LOQ = below quantification limit: PEA = 34 pM).

Table S1B. Calculated concentrations (pM) of SEA in examined chloroforms, hexane and ethyl acetate. Concentrations are calculated relative to injected standards of 1  $\mu$ M PEA in MeCN, taking into account the volume of solvent evaporated (15, 30 or 60 mL) and the reconstitution volume (100  $\mu$ L MeOH). (< LOQ = below quantification limit: SEA = 39 pM).

Figure legends:

Figure S1A. MS/MS-chromatogram of  $m/z$  300.25 in positive electrospray ionisation mode of PEA standard (1  $\mu$ M in MeCN) with corresponding MS/MS-spectrum ( $m/z$  30-325).

Figure S1B. MS/MS-chromatogram of  $m/z$  300.25 in positive electrospray ionisation mode of representative sample from evaporated chloroform (Fluka-brand, stabilised with amylene) with corresponding MS/MS-spectrum ( $m/z$  30-325).

Figure S2A. MS/MS-chromatogram of  $m/z$  328.25 in positive electrospray ionisation mode of SEA standard (1  $\mu$ M in MeCN) with corresponding MS/MS-spectrum ( $m/z$  30-325).

Figure S2B. MS/MS-chromatogram of  $m/z$  328.25 in positive electrospray ionisation mode of representative sample from evaporated chloroform (Fluka-brand, stabilised with amylene) with corresponding MS/MS-spectrum ( $m/z$  30-350).

Figure S3A. LC-MS chromatograms (SIM on both  $m/z$  326.25 and 396.25) from synthesis of 9,10-dichloro-SEA and from OEA in Merck LiChroSolv chloroform. From top to bottom: OEA in  $\text{CH}_2\text{Cl}_2$  after standing 120 min at ambient temperature, showing no formation of 9,10-dichloro-SEA; start of synthesis before addition of chlorine gas to the OEA solution; 15 min sample from the synthesis of 9,10-dichloro-SEA by chlorination of OEA, showing almost complete disappearance of OEA and subsequent formation of the product; sample of OEA in Merck LiChroSolv chloroform, showing disappearance of OEA and formation of a product with similar mass and retention time to the product from the chlorination synthesis, i.e. 9,10-dichloro-SEA.

Figure S3B. MS/MS-spectra of  $m/z$  396.25. Top: Product from chlorination of OEA in  $\text{CH}_2\text{Cl}_2$ ; Bottom: Product from reaction of OEA in Merck LiChrosolv chloroform.

Figure S4.  $^1\text{H-NMR}$  of OEA

Figure S5A. 2D- $^1\text{H-NMR}$  spectrum (COSY) of 9,10-dichloro-SEA (reaction product from OEA in Merck LiChrosolv)

Figure S5B. 2D- $^1\text{H-NMR}$  spectrum (COSY) of 9,10-dichloro-SEA (reaction product from OEA in Merck LiChrosolv); expansion of 0-4.5 ppm range with coupling between K+N and L+M protons shown.

| <b>Solvent, conc. pM PEA</b>  | <b>15 mL</b> |         | <b>30 mL</b> |        | <b>60 mL</b> |        | <b>Avg.</b> | <b>SD</b> | <b>CV%</b> |
|-------------------------------|--------------|---------|--------------|--------|--------------|--------|-------------|-----------|------------|
| Sigma ACS w. amylene, batch A | 355,8        | 398,3   | 379,1        | 340,8  | 356,1        | 499,9  | 388,3       | 58,3      | 15,0       |
| Sigma ACS w. amylene, batch B | < LOQ        |         |              |        |              |        |             |           |            |
| Sigma ACS w. EtOH, batch A    | 429,0        | 408,0   | 372,0        | 399,0  | 341,0        | 343,0  | 382,0       | 36,0      | 9,4        |
| Sigma ACS w. EtOH, batch B    | < LOQ        |         |              |        |              |        |             |           |            |
| Sigma ACS w. EtOH, batch C    | < LOQ        |         |              |        |              |        |             |           |            |
| Sigma CHROMASOLV w. amylene   | < LOQ        |         |              |        |              |        |             |           |            |
| Sigma CHROMASOLV w. EtOH      | < LOQ        |         |              |        |              |        |             |           |            |
| Fluka w. amylene, batch A     | 11715,2      | 11858,0 | 10042,5      | 9976,6 | 8302,3       | 7672,9 | 9927,9      | 1712,5    | 17,2       |
| Fluka w. amylene, batch B     | 445,4        | 472,9   | 356,3        | 280,6  | 385,3        | 399,3  | 390,0       | 68,1      | 17,5       |
| Fluka w. amylene, batch C     | 383,8        | 413,2   | 365,9        | 343,8  | 305,5        | 296,0  | 351,4       | 45,4      | 12,9       |
| Fluka w. EtOH, batch A        | 342,5        | 322,3   | 308,2        | 280,4  | 285,7        | 285,8  | 304,2       | 24,7      | 8,1        |
| Fluka w. EtOH, batch B        | < LOQ        |         |              |        |              |        |             |           |            |
| Fluka w. EtOH, batch C        | 2254,4       | 2197,7  | 1977,3       | 1993,6 | 1708,3       | 1712,5 | 1974,0      | 231,5     | 11,7       |
| Merck EMSURE w. EtOH, batch A | 84,0         | 76,8    | 66,1         | 72,6   | 125,4        | 113,1  | 89,7        | 24,0      | 26,7       |
| Merck EMSURE w. EtOH, batch B | < LOQ        |         |              |        |              |        |             |           |            |
| Merck LiChroSolv w. amylene   | < LOQ        |         |              |        |              |        |             |           |            |
| Alpha-Aesar w. amylene        | < LOQ        |         |              |        |              |        |             |           |            |
| Alpha-Aesar w. EtOH           | < LOQ        |         |              |        |              |        |             |           |            |
| Merck n-Hexane p.a.           | < LOQ        |         |              |        |              |        |             |           |            |
| Merck ethyl acetate p.a.      | < LOQ        |         |              |        |              |        |             |           |            |

Table S1A

| <b>Solvent, conc. pM PEA</b>  | <b>15 mL</b> |         | <b>30 mL</b> |        | <b>60 mL</b> |        | <b>Avg.</b> | <b>SD</b> | <b>CV%</b> |
|-------------------------------|--------------|---------|--------------|--------|--------------|--------|-------------|-----------|------------|
| Sigma ACS w. amylene, batch A | 269,4        | 341,1   | 331,0        | 305,7  | 289,2        | 293,7  | 305,0       | 26,92     | 8,83       |
| Sigma ACS w. amylene, batch B | < LOQ        |         |              |        |              |        |             |           |            |
| Sigma ACS w. EtOH, batch A    | 408,1        | 414,7   | 397,7        | 538,9  | 457,1        | 379,8  | 432,7       | 58,01     | 13,41      |
| Sigma ACS w. EtOH, batch B    | < LOQ        |         |              |        |              |        |             |           |            |
| Sigma ACS w. EtOH, batch C    | < LOQ        |         |              |        |              |        |             |           |            |
| Sigma CHROMASOLV w. amylene   | < LOQ        |         |              |        |              |        |             |           |            |
| Sigma CHROMASOLV w. EtOH      | < LOQ        |         |              |        |              |        |             |           |            |
| Fluka w. amylene, batch A     | 11145,6      | 11723,4 | 8916,2       | 9689,8 | 6728,2       | 6656,8 | 9143,3      | 2146,25   | 23,47      |
| Fluka w. amylene, batch B     | 619,4        | 630,9   | 424,2        | 317,3  | 411,5        | 398,3  | 466,9       | 128,15    | 27,45      |
| Fluka w. amylene, batch C     | 730,6        | 704,0   | 551,8        | 569,8  | 462,4        | 454,3  | 578,8       | 117,11    | 20,23      |
| Fluka w. EtOH, batch A        | 308,7        | 281,0   | 389,0        | 318,9  | 379,1        | 327,4  | 334,0       | 41,91     | 12,55      |
| Fluka w. EtOH, batch B        | < LOQ        |         |              |        |              |        |             |           |            |
| Fluka w. EtOH, batch C        | 3485,0       | 3302,7  | 2829,8       | 2686,2 | 2352,9       | 2012,8 | 2778,2      | 557,22    | 20,06      |
| Merck EMSURE w. EtOH, batch A | 106,3        | 110,3   | 111,6        | 124,3  | 124,5        | 81,5   | 109,8       | 15,76     | 14,36      |
| Merck EMSURE w. EtOH, batch B | < LOQ        |         |              |        |              |        |             |           |            |
| Merck LiChroSolv w. amylene   | < LOQ        |         |              |        |              |        |             |           |            |
| Alpha-Aesar w. amylene        | < LOQ        |         |              |        |              |        |             |           |            |
| Alpha-Aesar w. EtOH           | < LOQ        |         |              |        |              |        |             |           |            |
| Merck n-Hexane p.a.           | < LOQ        |         |              |        |              |        |             |           |            |
| Merck ethyl acetate p.a.      | < LOQ        |         |              |        |              |        |             |           |            |

Table S1B

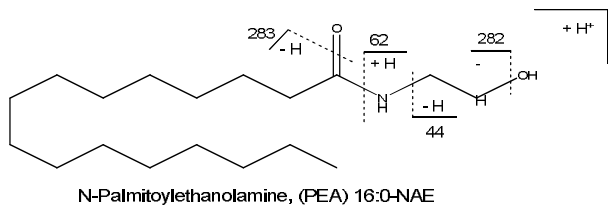

F:\XCalibur...\0915A9CS\NAEAMS220

15-09-2009 18:34:29

PEA+SEA std

RT: 0,00 - 11,00 SM: 7G

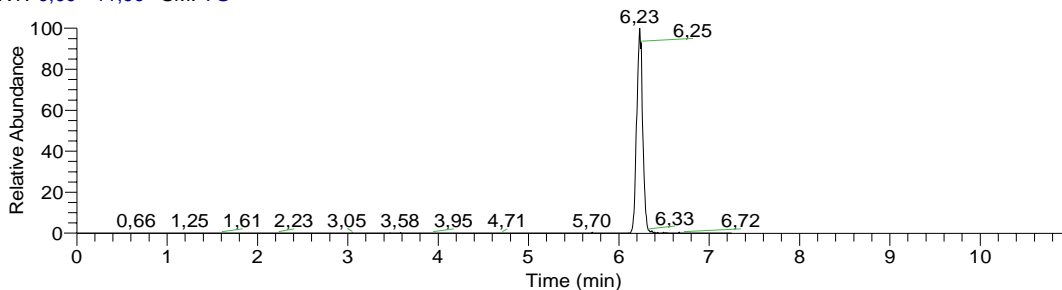

NL: 2,34E7  
TIC F: + c ESI  
sid=6,00 Full ms2  
300,250@cid22,00  
[30,000-325,000] MS  
NAEAMS220

NAEAMS220 #1774-1800 RT: 6,19-6,28 AV: 27 NL: 4,36E6  
F: + c ESI sid=6,00 Full ms2 300,250@cid22,00 [30,000-325,000]

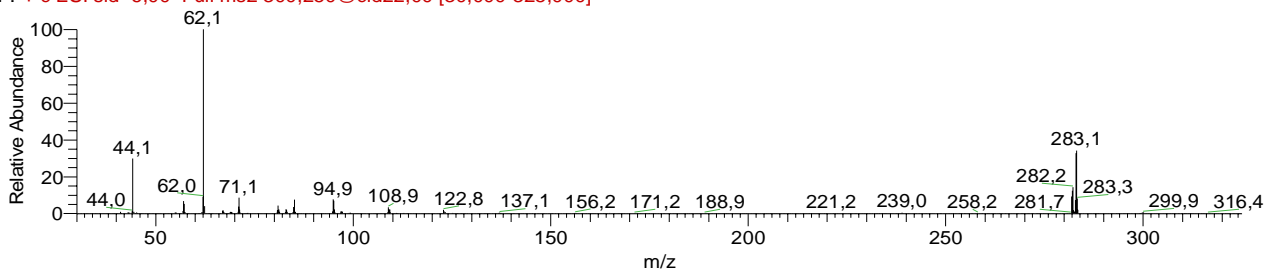

Figure S1A

F:\XCalibur...\0915A9CS\NAEAMS214

15-09-2009 17:23:07

5A, 15 mL

RT: 0,00 - 11,00 SM: 7G

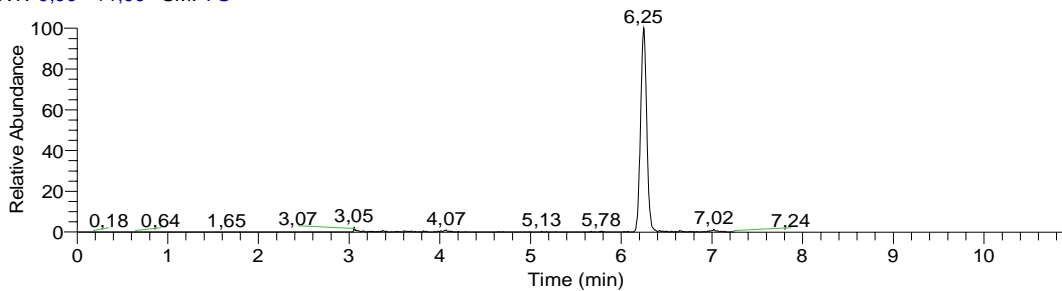

NL: 4,94E7  
TIC F: + c ESI  
sid=6,00 Full ms2  
300,250@cid22,00  
[30,000-325,000] MS  
NAEAMS214

NAEAMS214 #1777-1803 RT: 6,20-6,29 AV: 27 NL: 1,00E7  
F: + c ESI sid=6,00 Full ms2 300,250@cid22,00 [30,000-325,000]

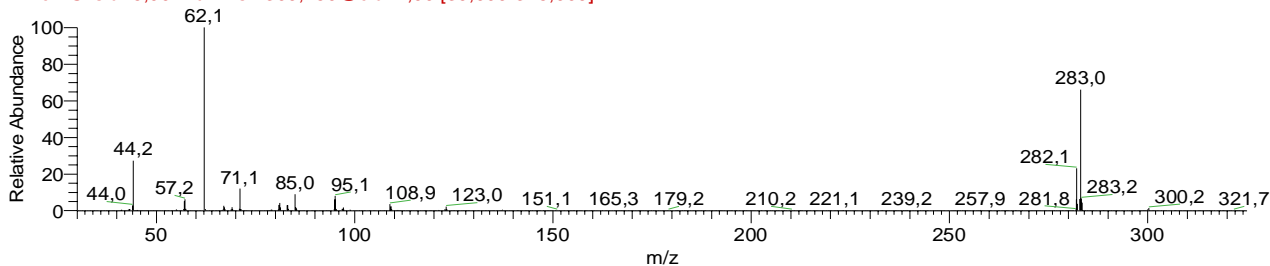

Figure S1B

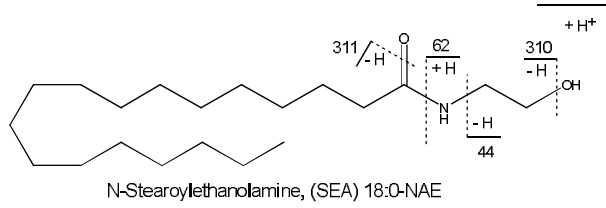

F:\XCalibur...\0915A9CS\NAEAMS218

15-09-2009 18:10:42

PEA+SEA std

RT: 0,00 - 11,00 SM: 7G

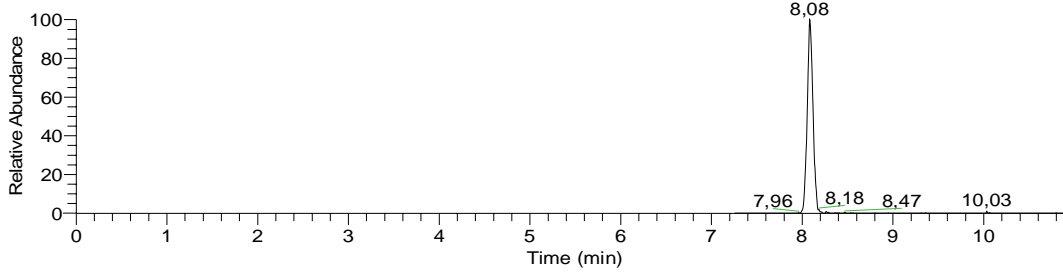

NL: 2,66E7  
TIC F: + c ESI  
sid=6,00 Full ms2  
328,250@cid22,00  
[30,000-350,000] MS  
NAEAMS218

NAEAMS218 #2305-2329 RT: 8,05-8,13 AV: 25 NL: 5,71E6  
F: + c ESI sid=6,00 Full ms2 328,250@cid22,00 [30,000-350,000]

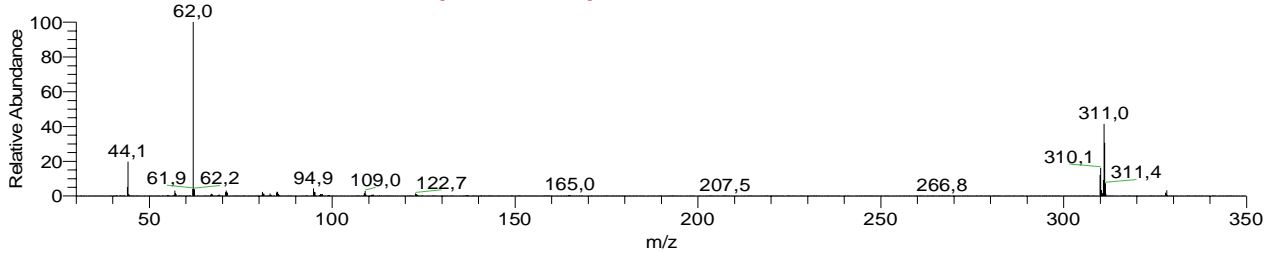

Figure S2A

F:\XCalibur...\0915A9CS\NAEAMS214

15-09-2009 17:23:07

5A, 15 mL

RT: 0,00 - 11,00 SM: 7G

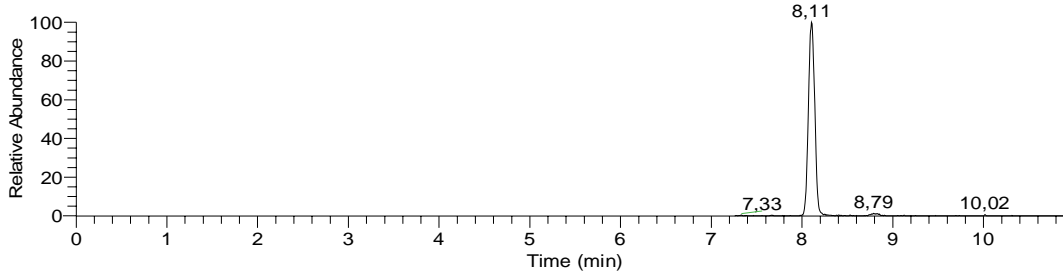

NL: 5,53E7  
TIC F: + c ESI  
sid=6,00 Full ms2  
328,250@cid22,00  
[30,000-350,000] MS  
NAEAMS214

NAEAMS214 #2305-2337 RT: 8,05-8,16 AV: 33 NL: 1,11E7  
F: + c ESI sid=6,00 Full ms2 328,250@cid22,00 [30,000-350,000]

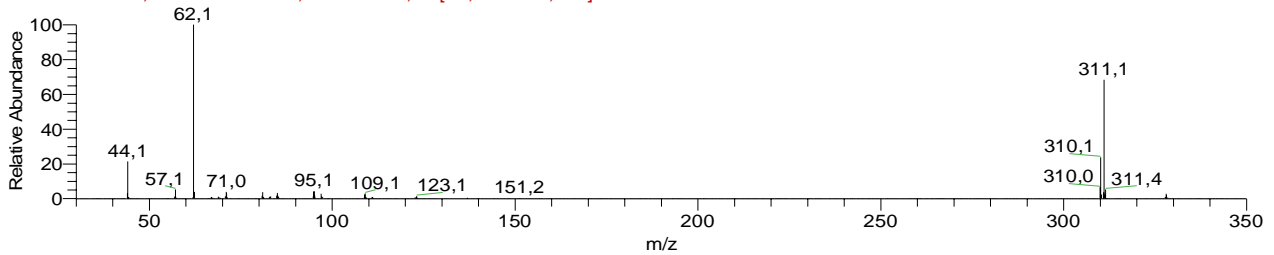

Figure S2B

RT: 0,00 - 11,00 SM: 7G

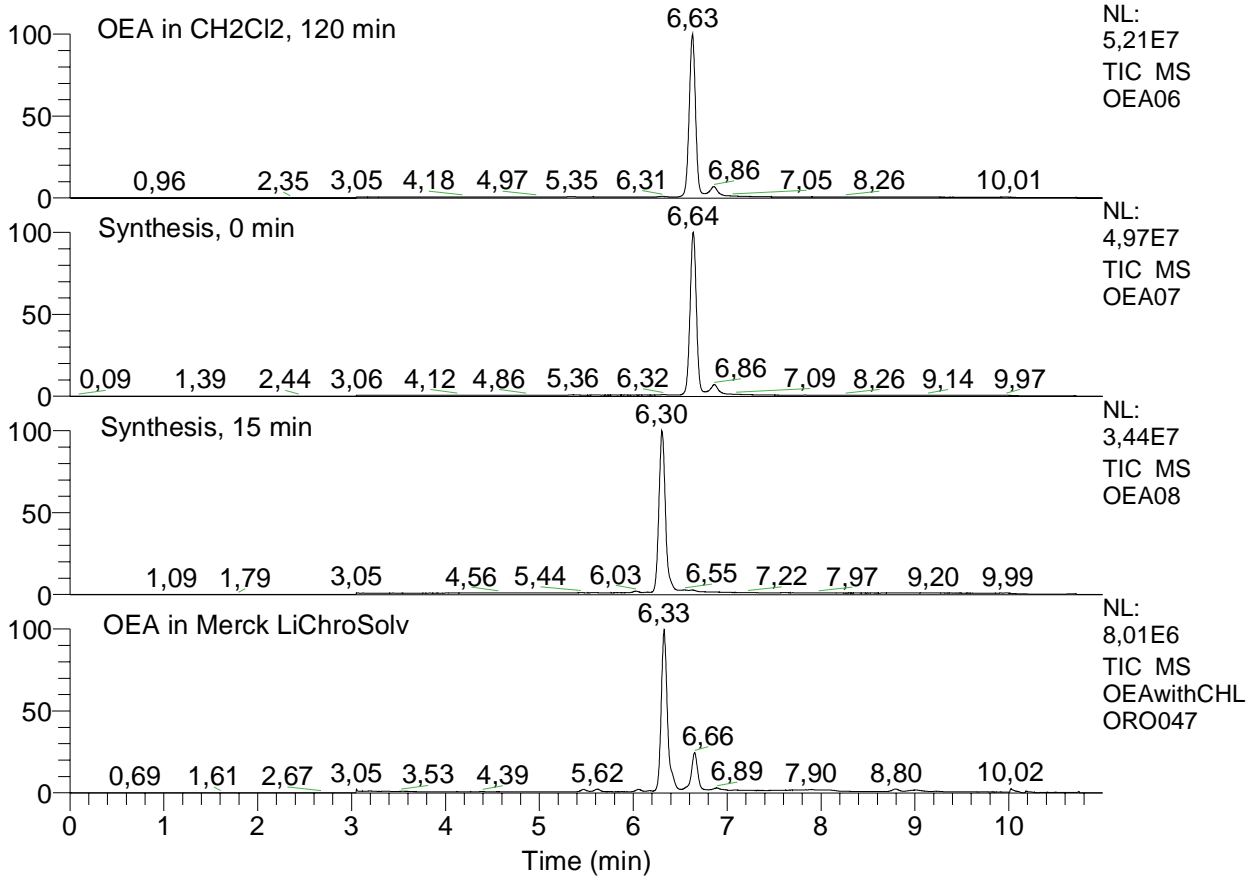

Fig. S3A

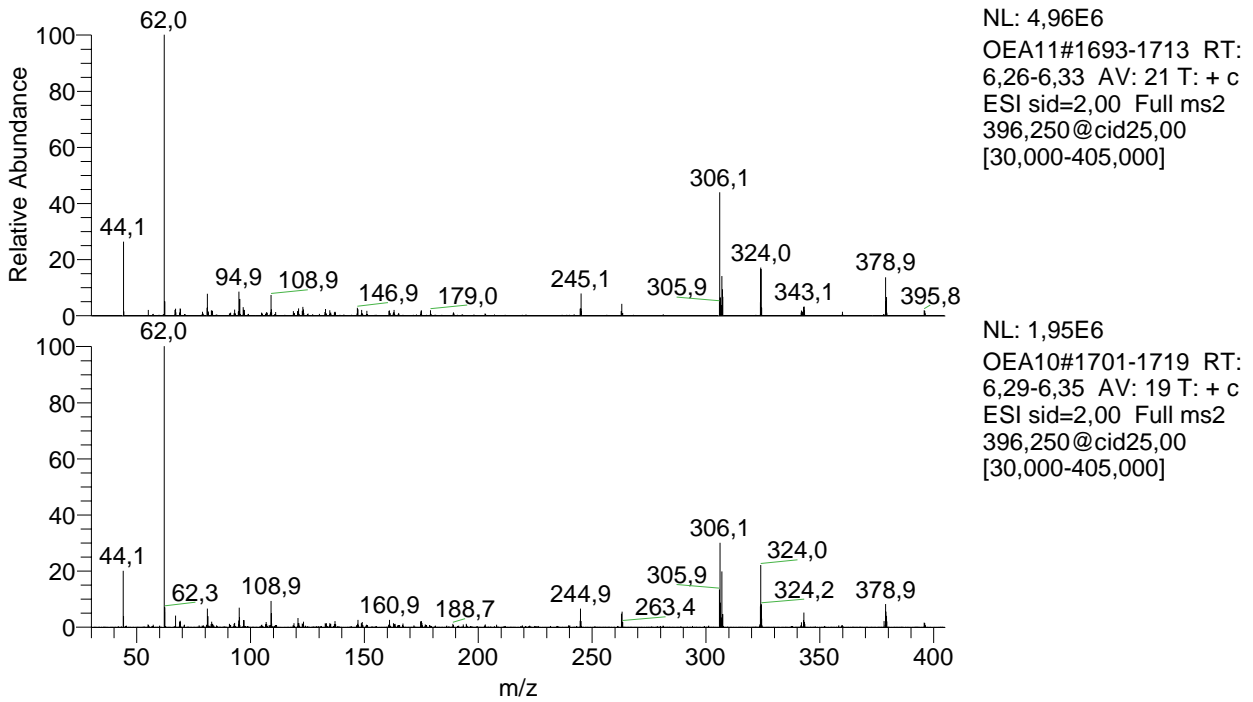

Fig. S3B

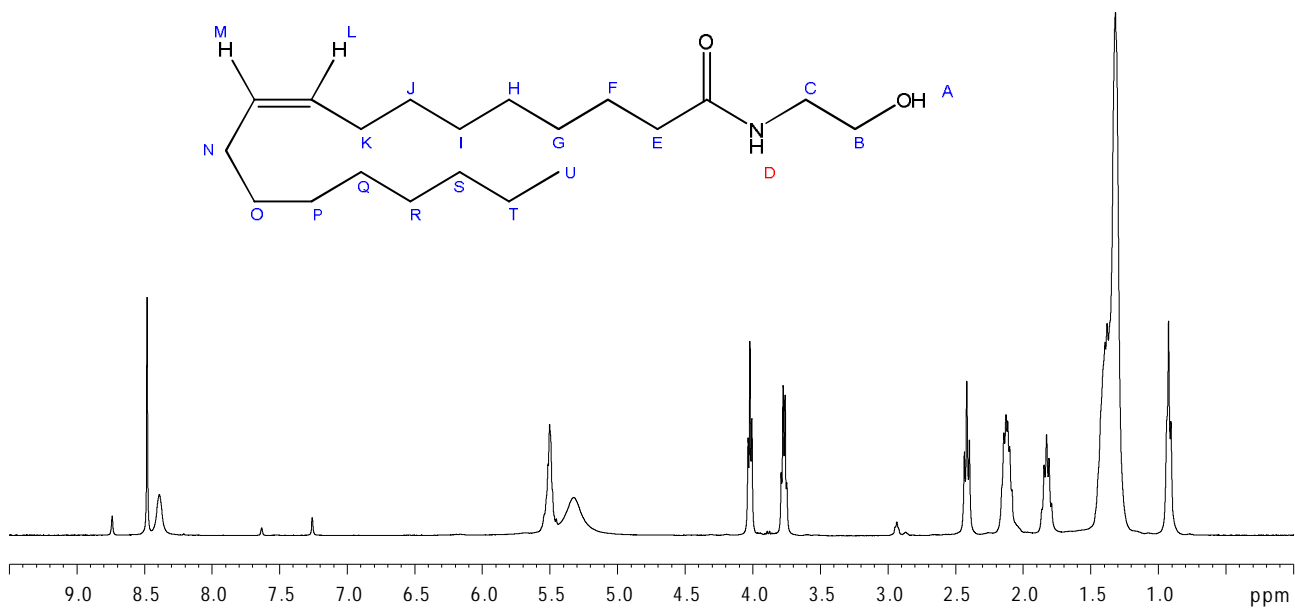

Fig. S4

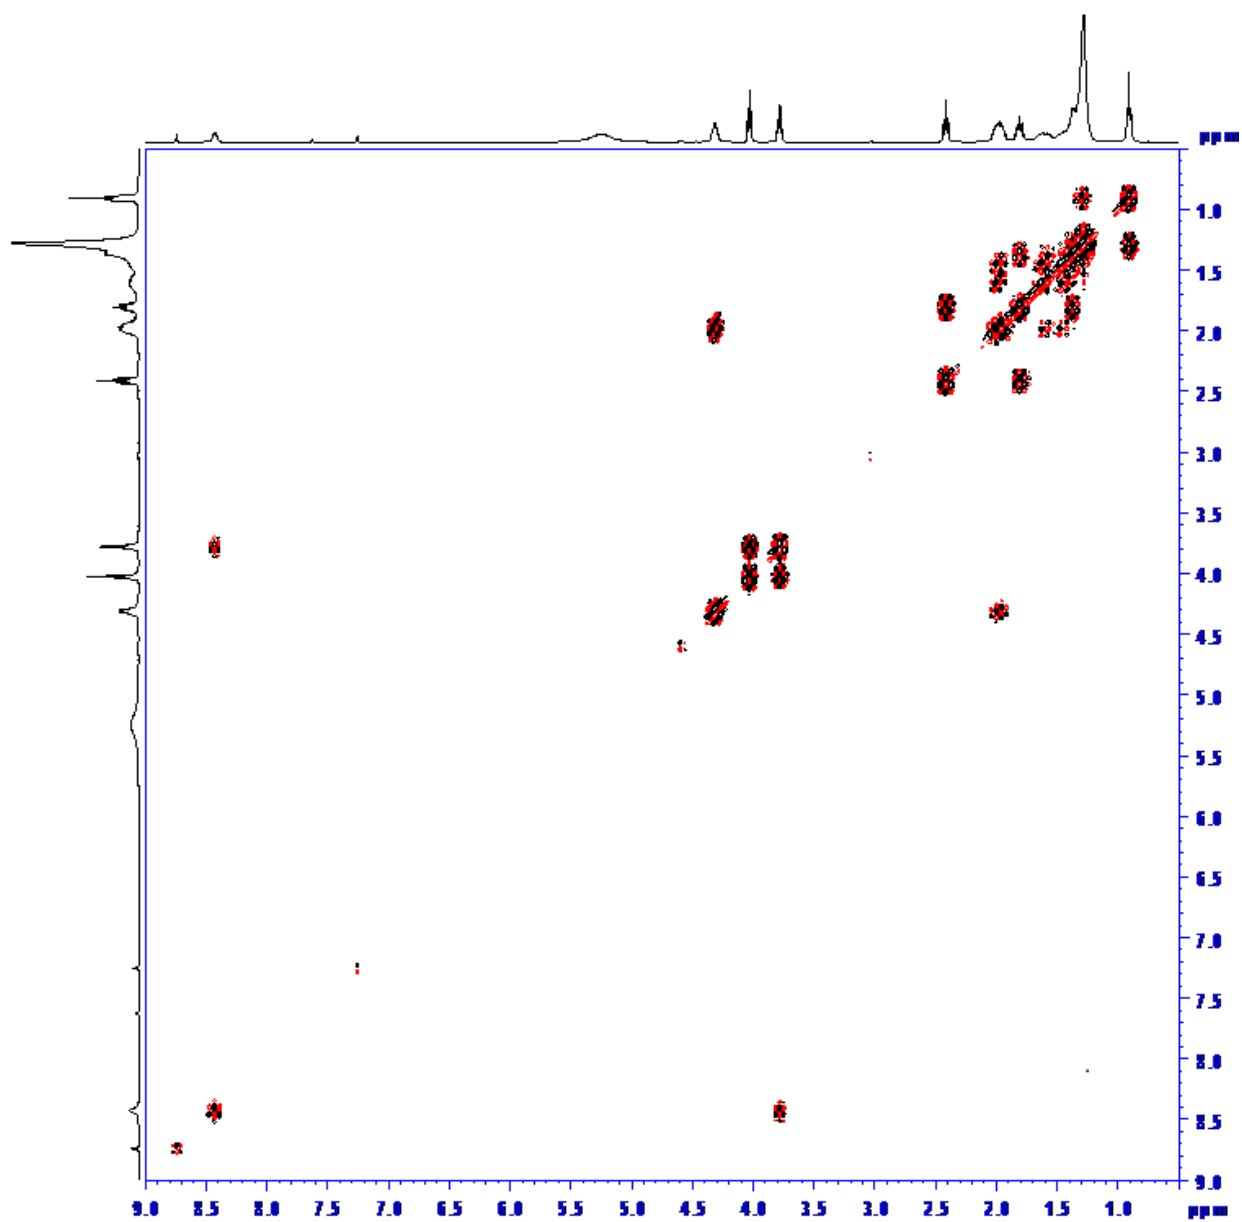

Fig. S5A



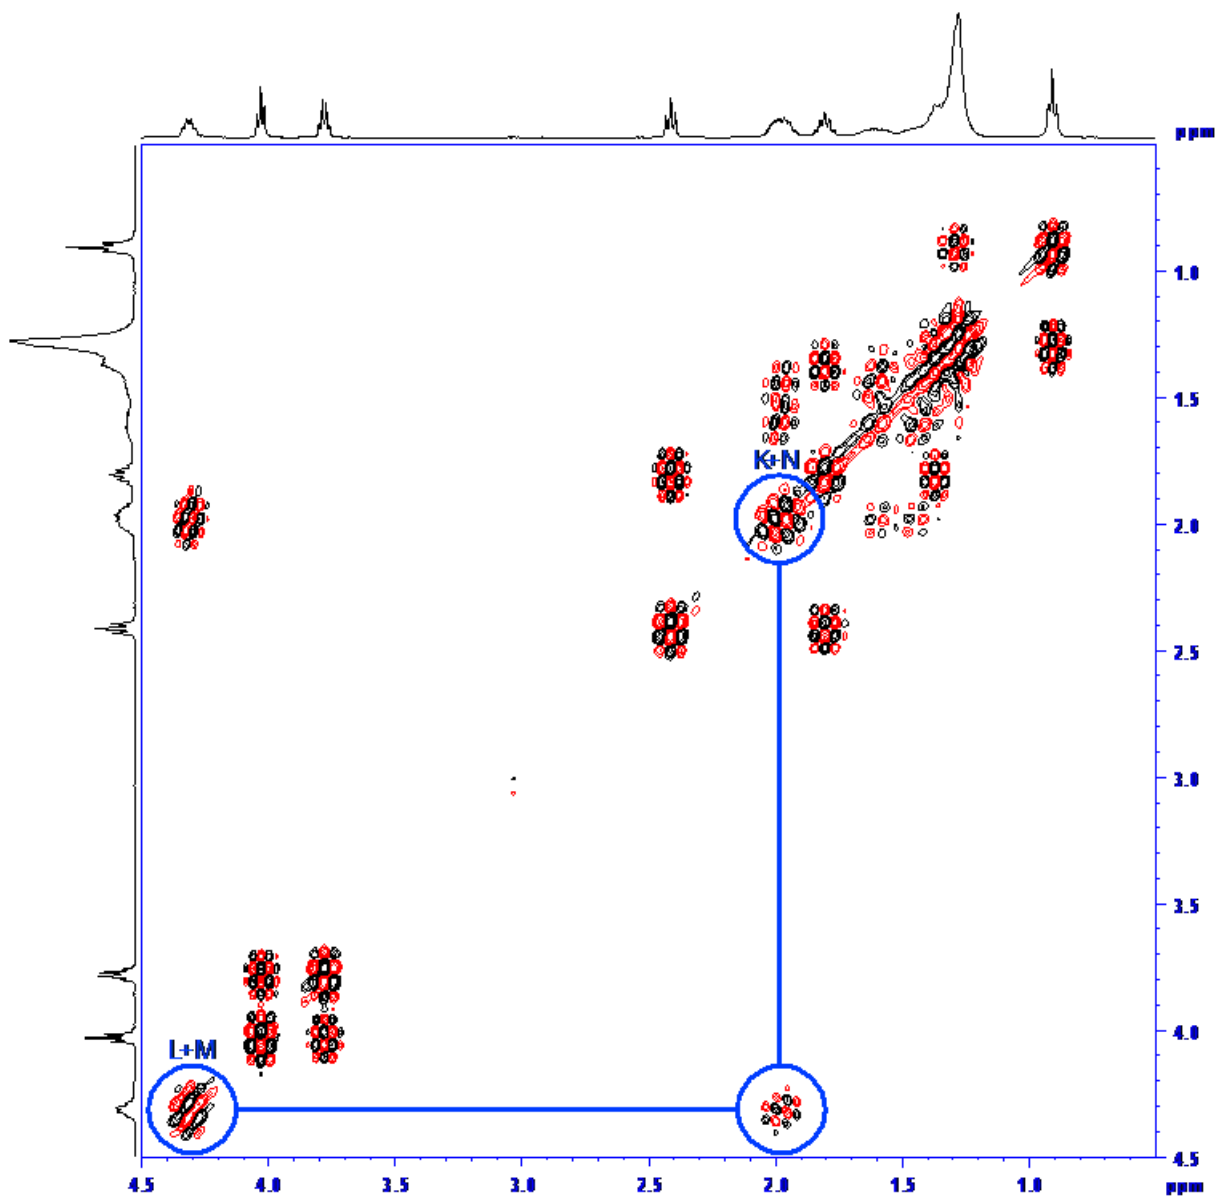

Fig. S5B
